# Supplementary material for: The Effect of Oil-Based Cannabis Extracts on Metabolic Parameters and Microbiota Composition of Mice Fed a Standard and a High-Fat Diet
Source: MDPI journal article supplement (doi:10.3390/ijms25021073), 2024-01-16
Supplement: s1 [file s1]

## Supplementary Information

### The effect of commercially available medical cannabis oils on obesity parameters and microbiota composition

Adi Eitan, Ofer Gover, Liron Sulimani, David Meiri, Naama Shterzer , Erez Mills, and Betty Schwartz

**Table S1: Fatty acid composition of the STD and HFD used in this study**

|                               | HFD   | STD  |
|-------------------------------|-------|------|
| Total fat (g/kg)              | 342.7 | 62   |
| Saturated fat (g/kg)          | 119.2 | 0.63 |
| C14:0 myristic                | 3.1   | -    |
| C16:0 Palmitic                | 74.6  | 0.49 |
| C18:0 Stearic                 | 41.5  | 0.14 |
| Monounsaturated fat (g/kg)    | 134   | 9.1  |
| C16:1 Palmitoleic             | 6.2   | -    |
| C18:1 Oleic                   | 127.8 | 8.4  |
| Polyunsaturated fat (g/kg)    | 77.2  | 23.8 |
| C18:2 Linoleic                | 71.7  | 21.7 |
| C18:3 Linolenic               | 5.5   | 0.21 |
| $\omega$ 6: $\omega$ 3 ration | 13    | 10   |

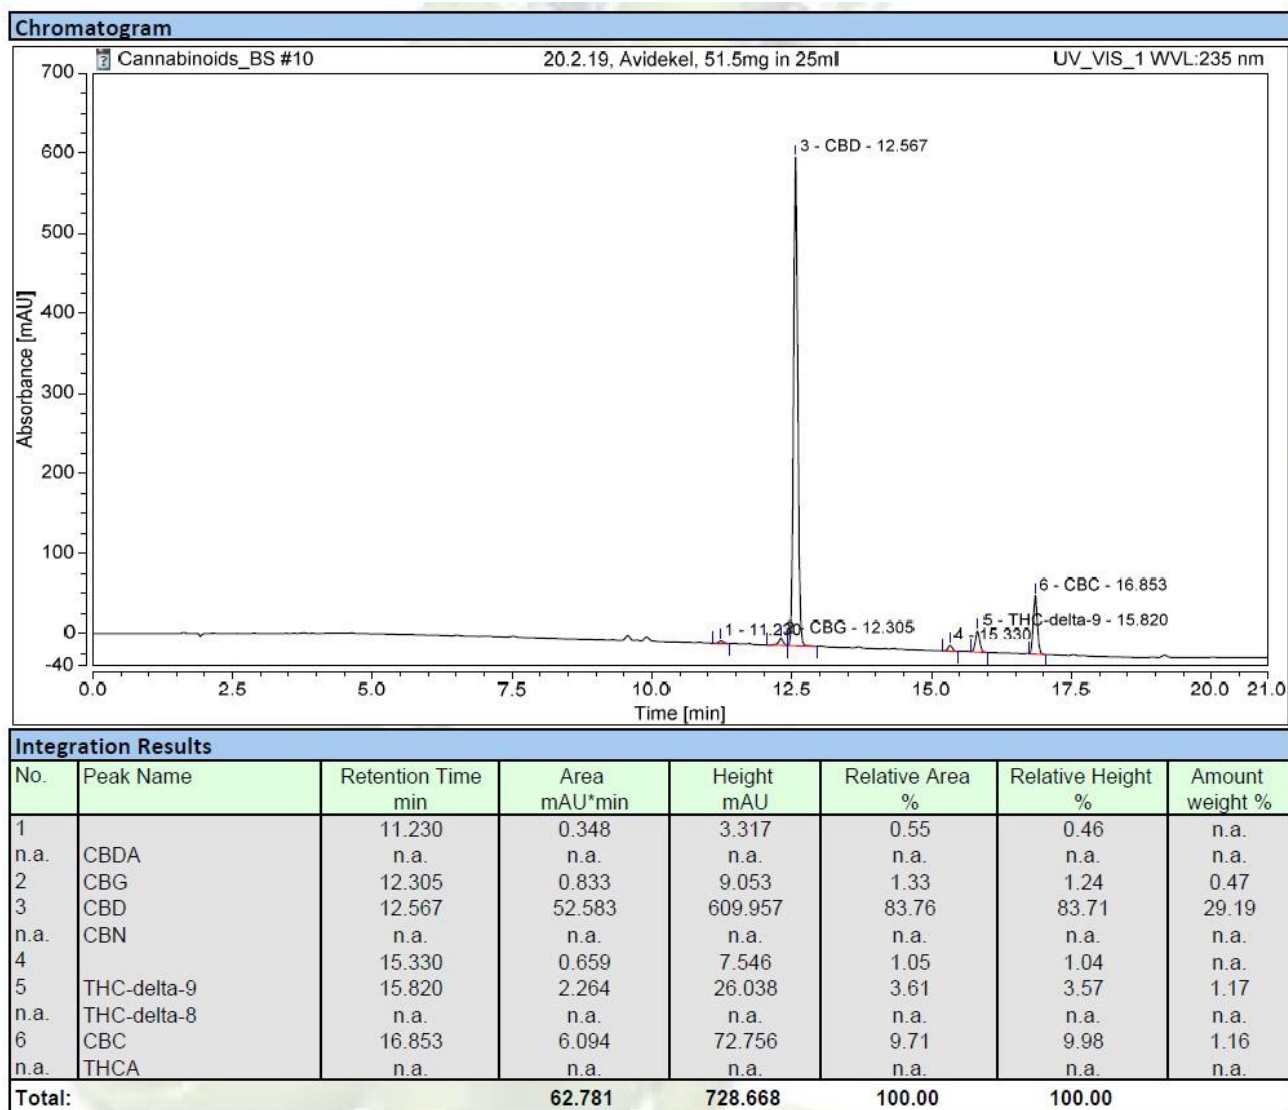

**Figure S1. Chromatogram of Avidekel extract.** Phytocannabinoid profiling of Avidekel oil extract was performed according to the method described in the materials and method section.

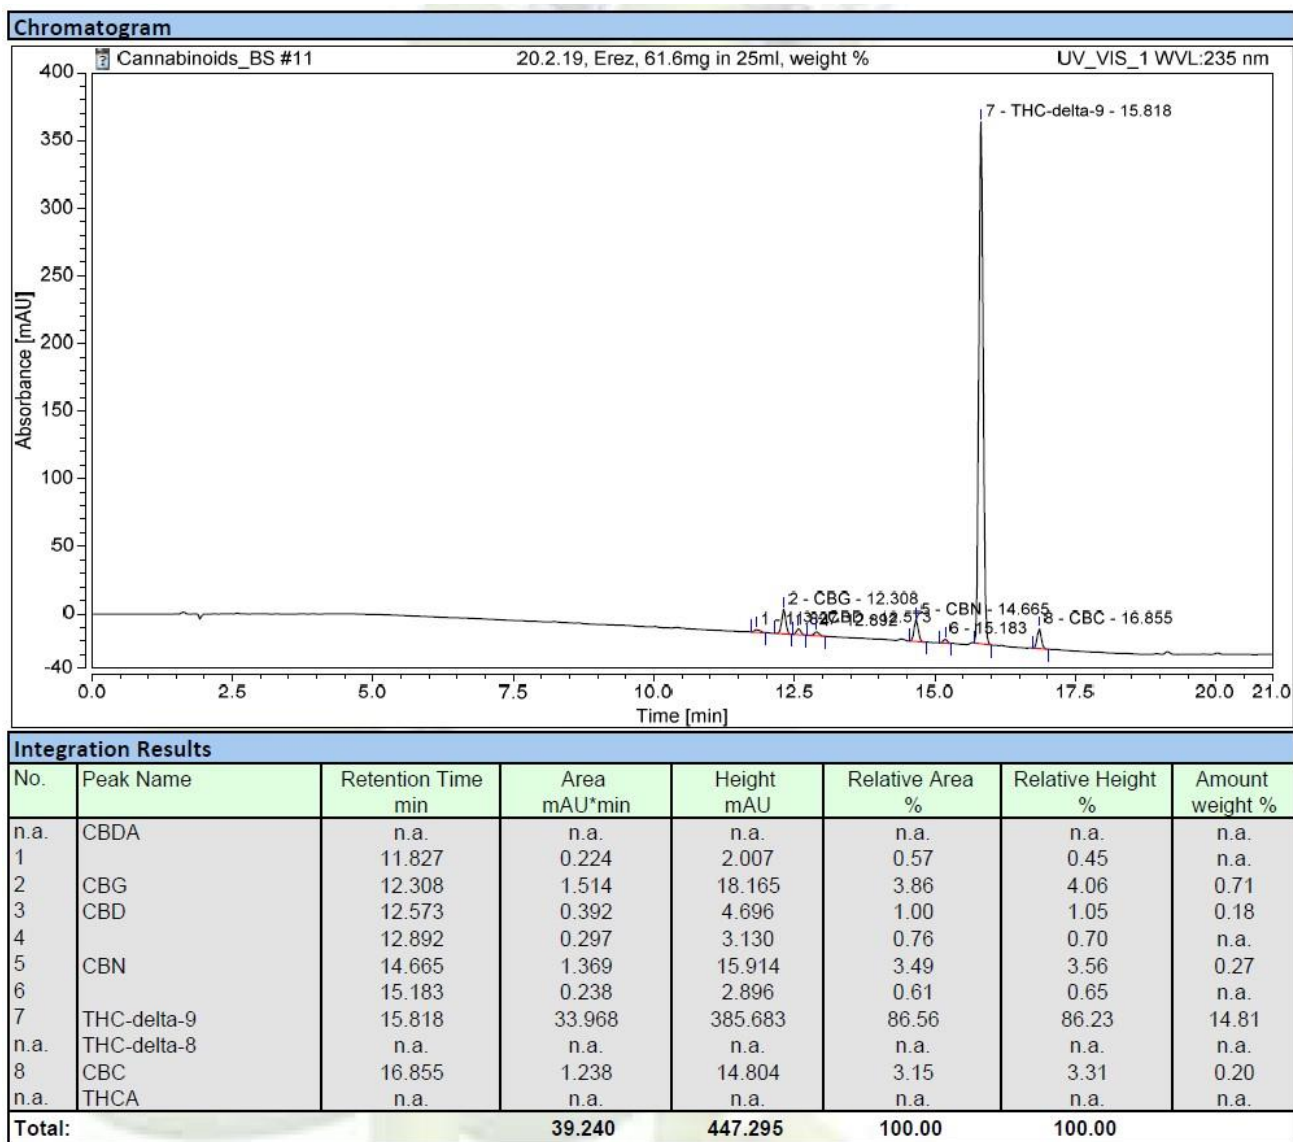

**Figure S2. Chromatogram of Erez extract.** Phytocannabinoid profiling of Erez oil extract was performed according to the method described in the materials and method section.

**Table S2: Terpenes assayed by GC-FID - Avidekel extract**

| Test                                    | mg/g | % Total Terpenes |
|-----------------------------------------|------|------------------|
| <b>Terpenes Assay By GC-FID</b>         |      |                  |
| <i><math>\alpha</math>-pinene</i>       | 0.02 | 0.3              |
| <i>Camphene</i>                         | 0.00 | 0.0              |
| <i>Myrcene</i>                          | 1.98 | 28.4             |
| <i><math>\beta</math>-Pinene</i>        | 0.05 | 0.7              |
| <i>d-Limonene</i>                       | 0.90 | 12.9             |
| <i><math>\beta</math>-ocimene</i>       | 0.17 | 2.4              |
| <i>Eucalyptol</i>                       | 0.32 | 4.6              |
| <i><math>\gamma</math>-Terpinene</i>    | 0.06 | 0.9              |
| <i>Terpinolene</i>                      | 0.19 | 2.8              |
| <i>Linalool</i>                         | 1.24 | 17.8             |
| <i>Geraniol</i>                         | 0.00 | 0.0              |
| <i><math>\beta</math>-Caryophyllene</i> | 1.67 | 24.0             |
| <i><math>\alpha</math>-Humulene</i>     | 0.37 | 5.3              |
| <i>Nerolidol</i>                        | 0.00 | 0.0              |
| <i><math>\alpha</math>-Bisabolol</i>    | 0.00 | 0.0              |
| <b>Total</b>                            | 6.97 | 100              |

**Table S3: Terpenes assayed by GC-FID - Erez extract**

| Test                                    | mg/g | % Total Terpenes |
|-----------------------------------------|------|------------------|
| <b>Terpenes Assay By GC-FID</b>         |      |                  |
| <i><math>\alpha</math>-pinene</i>       | 0.01 | 0.2              |
| <i>Camphene</i>                         | 0.00 | 0.0              |
| <i>Myrcene</i>                          | 0.13 | 3.0              |
| <i><math>\beta</math>-Pinene</i>        | 0.03 | 0.6              |
| <i>d-Limonene</i>                       | 0.12 | 2.8              |
| <i><math>\beta</math>-ocimene</i>       | 0.12 | 2.6              |
| <i>Eucalyptol</i>                       | 0.00 | 0.0              |
| <i><math>\gamma</math>-Terpinene</i>    | 0.04 | 0.9              |
| <i>Terpinolene</i>                      | 0.17 | 3.9              |
| <i>Linalool</i>                         | 0.56 | 12.5             |
| <i>Geraniol</i>                         | 0.00 | 0.0              |
| <i><math>\beta</math>-Caryophyllene</i> | 2.51 | 56.3             |
| <i><math>\alpha</math>-Humulene</i>     | 0.77 | 17.2             |
| <i>Nerolidol</i>                        | 0.00 | 0.0              |
| <i><math>\alpha</math>-Bisabolol</i>    | 0.00 | 0.0              |
| <b>Total</b>                            | 4.46 | 100              |

**Table S4: Primer list**

| Gene          | Forward primer          | Accession number |
|---------------|-------------------------|------------------|
|               | Reverse primer          |                  |
| F4/80         | CCTTTGGCTATGGGCTTCCA    | NM_001355722.1   |
|               | CCTCAGAACCCACAGTGTCC    |                  |
| CD14          | CTGAAGCCTTTCTCGGAGCC    | NM_009841.4      |
|               | GCATAAGCTTCATGGTCGGTAGA |                  |
| INF- $\gamma$ | AGCGCCAAGCATTCAATGAG    | NM_008337.4      |
|               | AATCTCTTCCCCACCCCGAA    |                  |
| IL-1 $\beta$  | TCGCTCAGGGTCACAAGAAA    | NM_008361.4      |
|               | CATCAGAGGCAAGGAGGAAAAC  |                  |
